# Supplementary material for: Enhanced reactivity of Li+@C60 toward thermal [2 + 2] cycloaddition by encapsulated Li+ Lewis acid
Source: publisher site journal article supplement (doi:10.3762/bjoc.20.58), 2024-03-25
Supplement: Additional file 1 [file 1860-5397-20-58-S1.pdf]

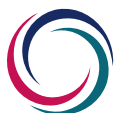

## Supporting Information

for

### Enhanced reactivity of $\text{Li}^+@C_{60}$ toward thermal [2 + 2] cycloaddition by encapsulated $\text{Li}^+$ Lewis acid

Hiroshi Ueno, Yu Yamazaki, Hiroshi Okada, Fuminori Misaizu, Ken Kokubo and Hidehiro Sakurai

*Beilstein J. Org. Chem.* **2024**, *20*, 653–660. doi:10.3762/bjoc.20.58

### HPLC profiles, NMR, HRMS, UV–vis absorption spectra, and computational details

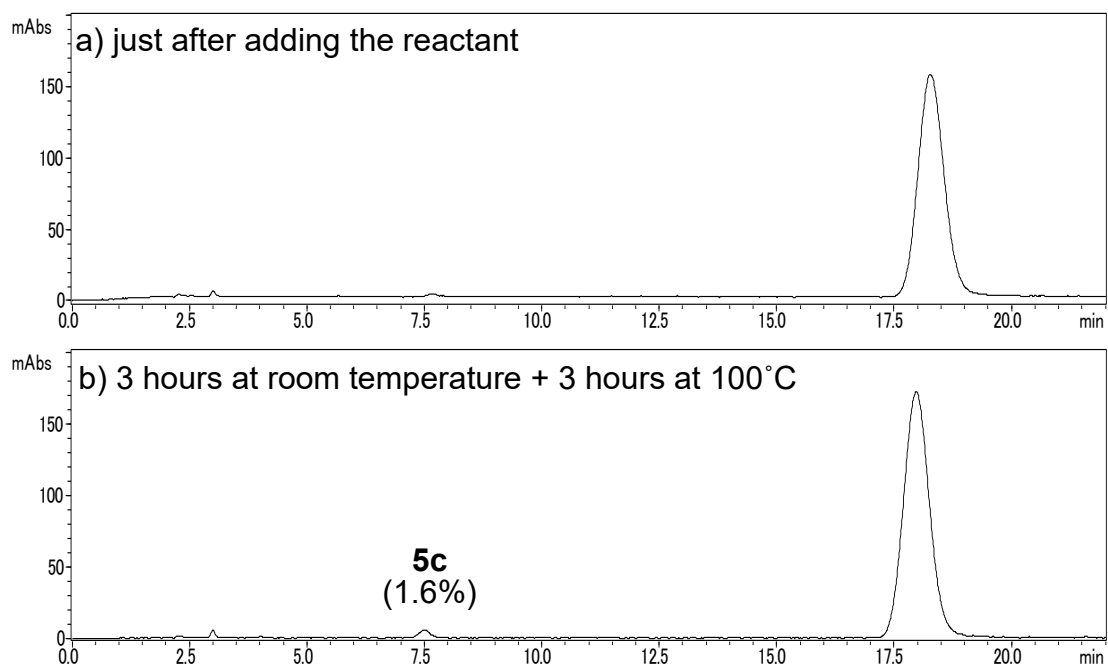

**Figure S1:** HPLC profiles for the reaction of  $\text{Li}^+\text{@C}_{60}\text{TFSI}^-$  (1 mM) and **3** (100 mM) in ODCB. a) just after adding the reactant, b) 3 hours at room temperature + 3 hours at 100 °C.

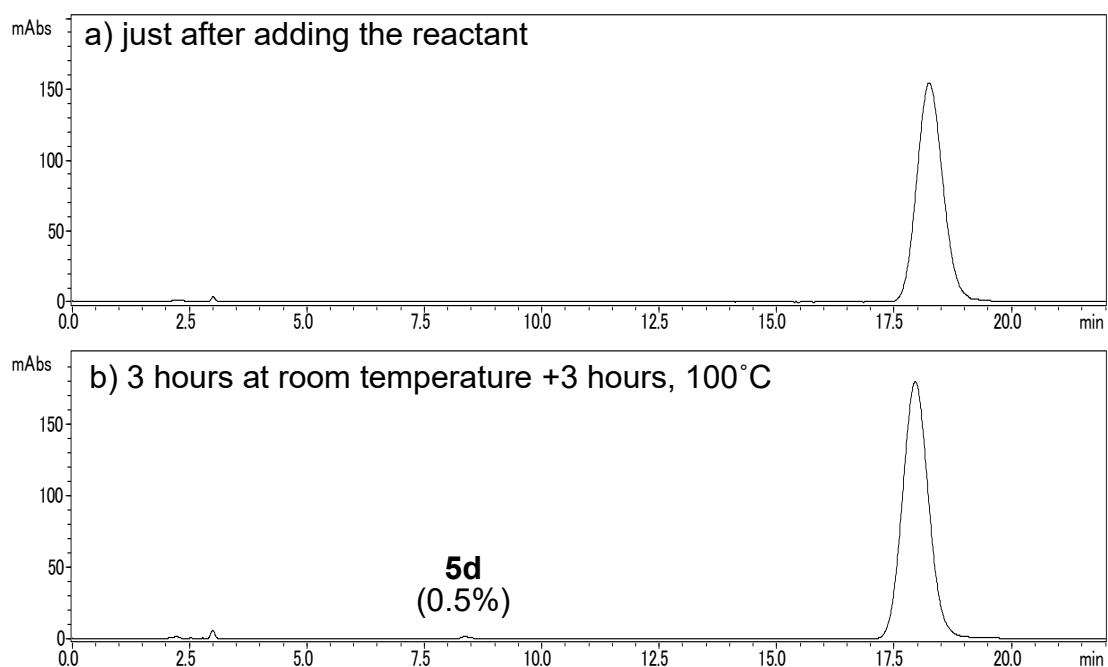

**Figure S2:** HPLC profiles for the reaction of  $\text{Li}^+\text{@C}_{60}\text{TFSI}^-$  (1 mM) and **4** (100 mM) in ODCB. a) just after adding the reactant, b) 3 hours at room temperature + 3 hours at 100 °C.

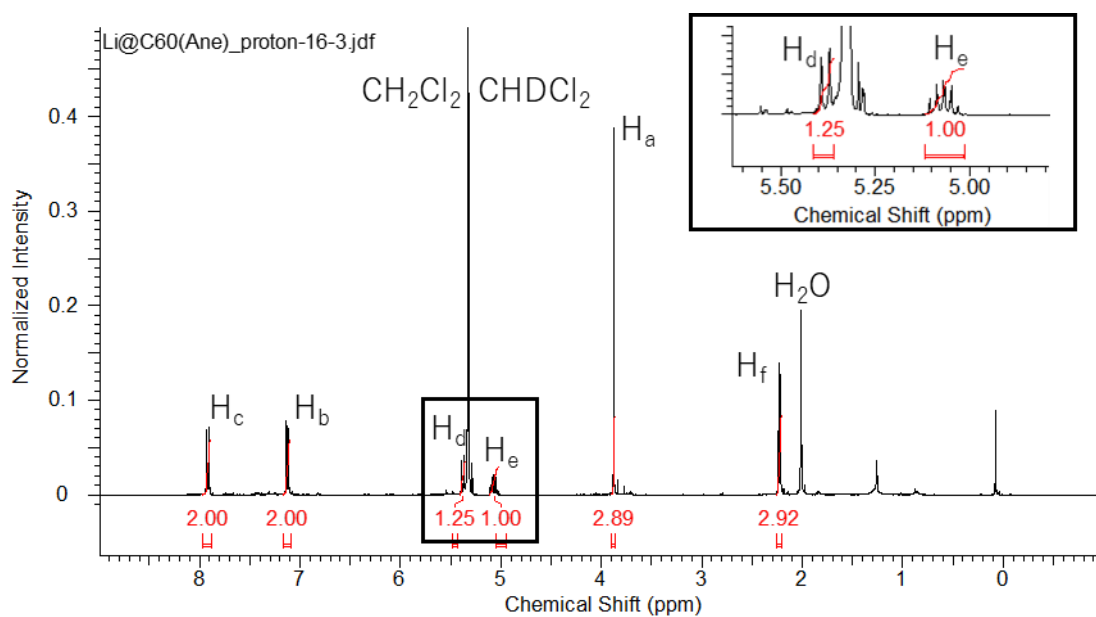

**Figure S3:** <sup>1</sup>H NMR spectrum (400 MHz, CD<sub>2</sub>Cl<sub>2</sub>) of **5a**.

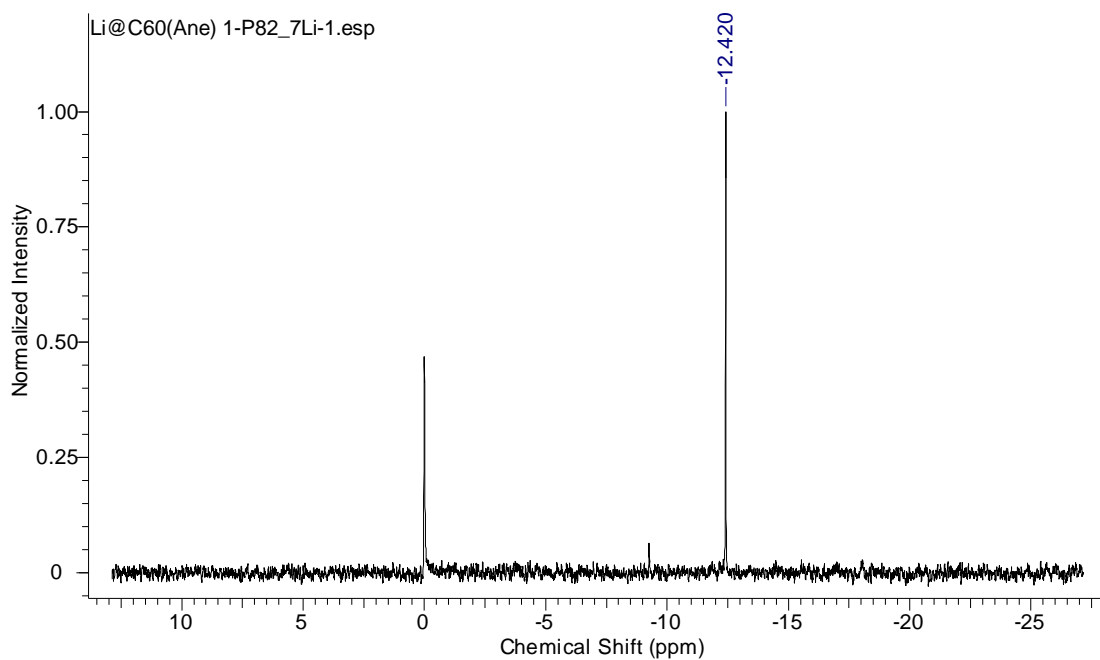

**Figure S4:** <sup>7</sup>Li NMR spectrum (155 MHz, CD<sub>2</sub>Cl<sub>2</sub>) of **5a**. LiCl in D<sub>2</sub>O was used as an external standard (0 ppm)

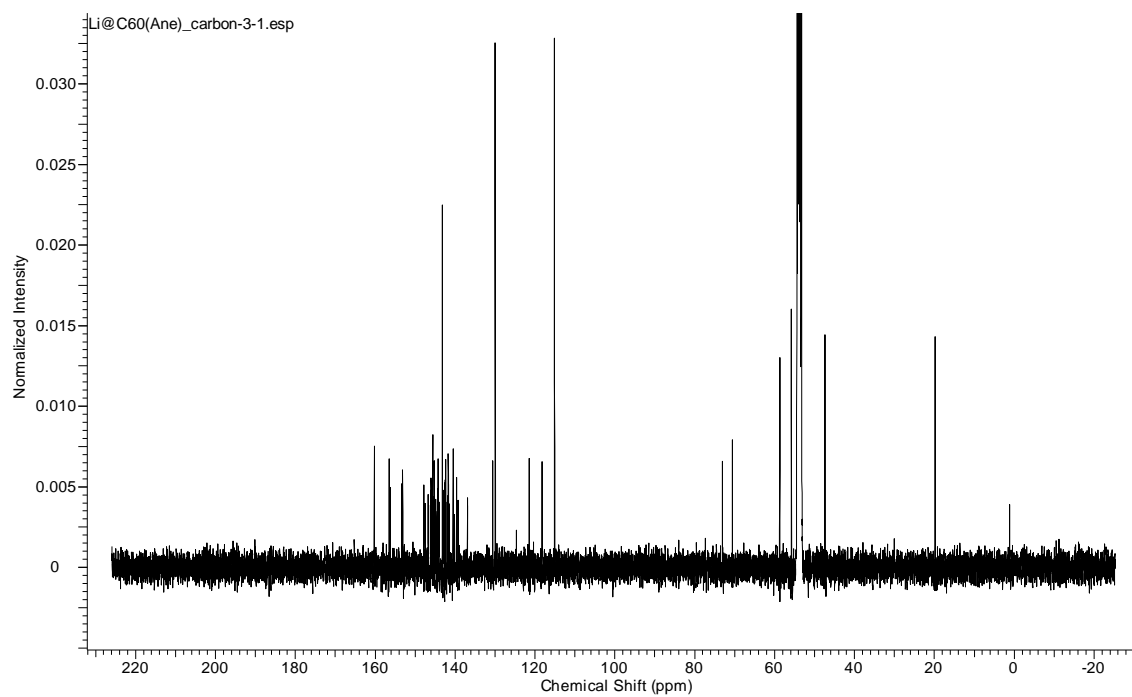

**Figure S5:**  $^{13}\text{C}$  NMR spectrum (100 MHz,  $\text{CD}_2\text{Cl}_2$ ) of **5a**.

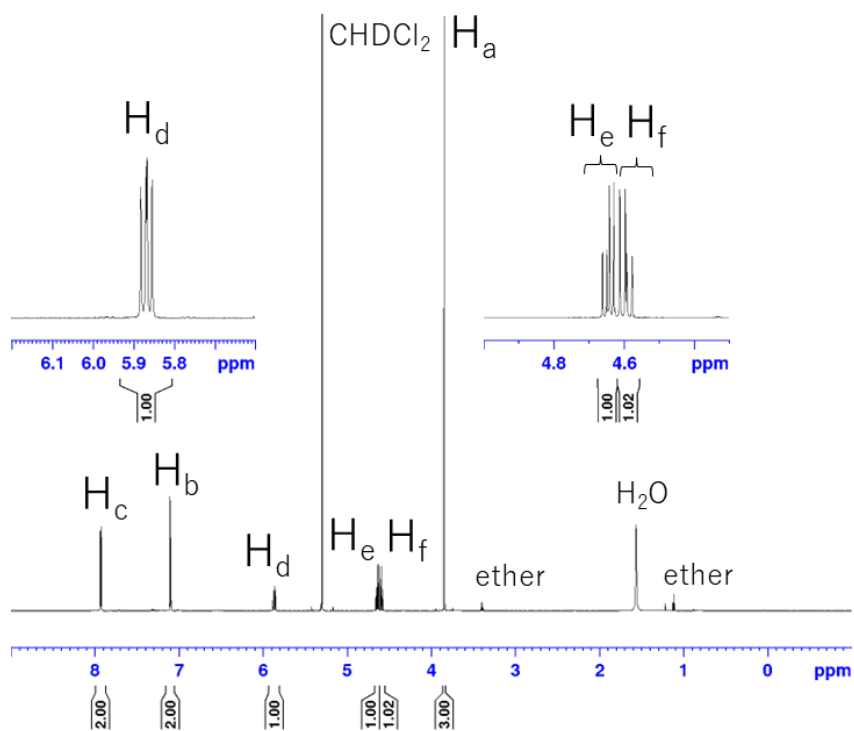

**Figure S6:**  $^1\text{H}$  NMR spectrum (700 MHz,  $\text{CD}_2\text{Cl}_2$ ) of **5b**.

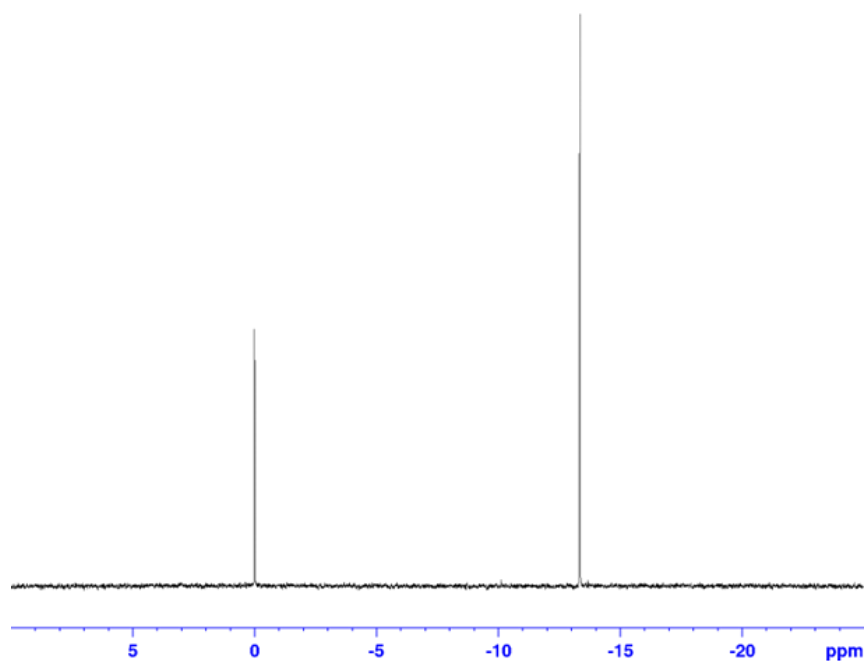

**Figure S7:**  $^7\text{Li}$  NMR spectrum (272 MHz,  $\text{CD}_2\text{Cl}_2$ ) of **5b**.  $\text{LiCl}$  in  $\text{D}_2\text{O}$  was used as an external standard (0 ppm).

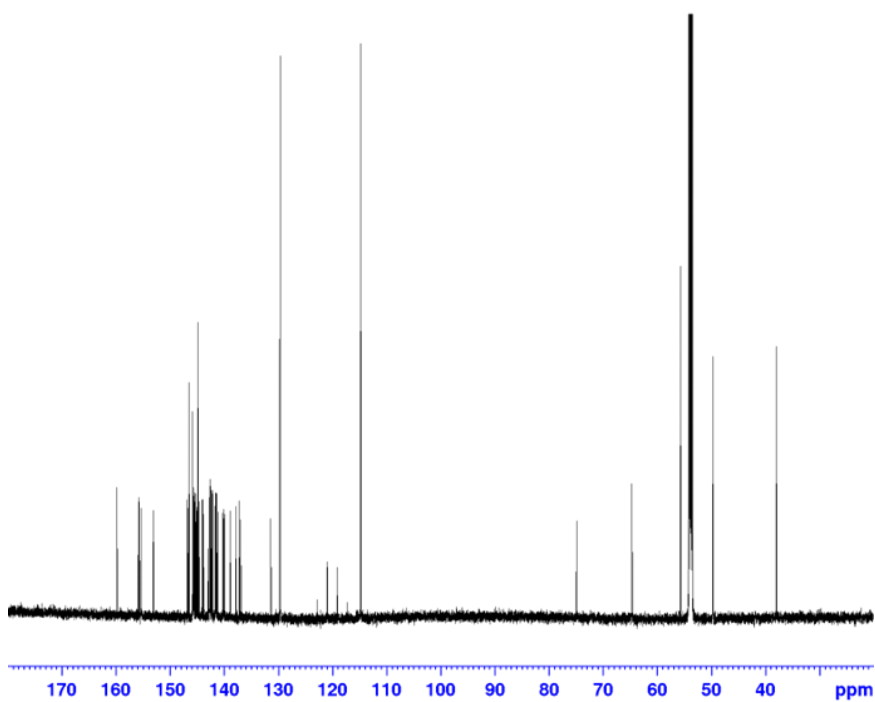

**Figure S8:**  $^{13}\text{C}$  NMR spectrum (176 MHz,  $\text{CD}_2\text{Cl}_2$ ) of **5b**.

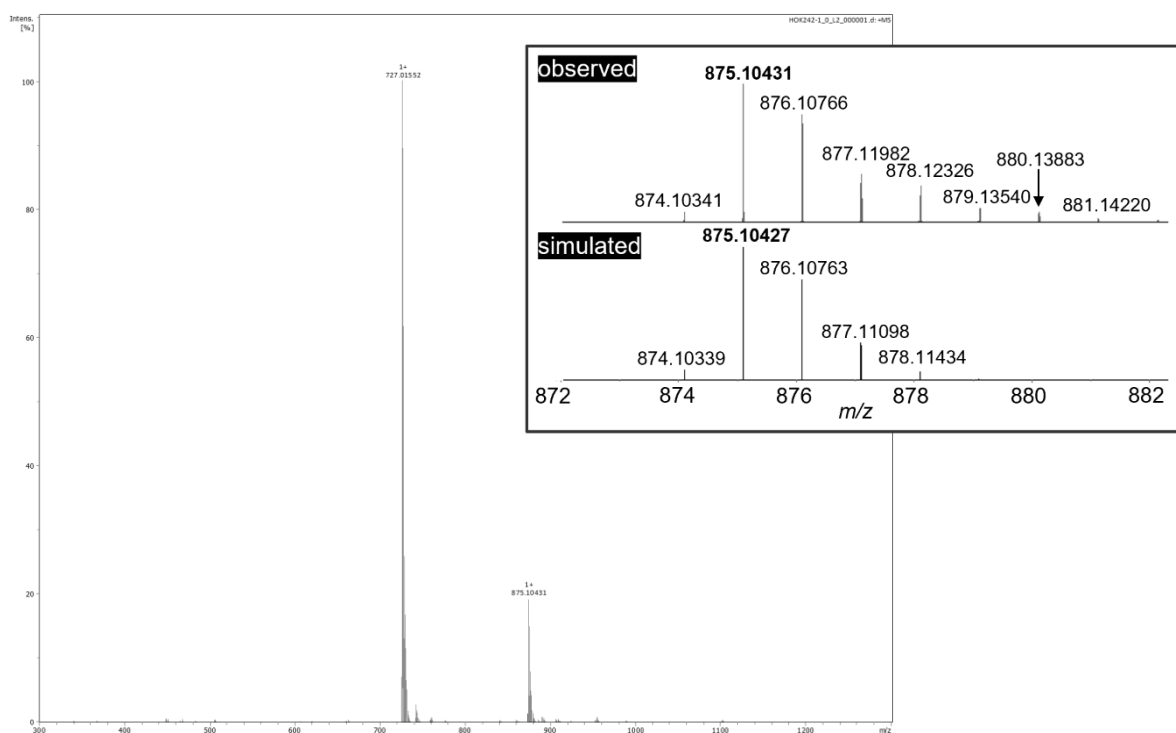

**Figure S9:** HRMS-MALDI (positive, dithranol) spectrum of **5a**.

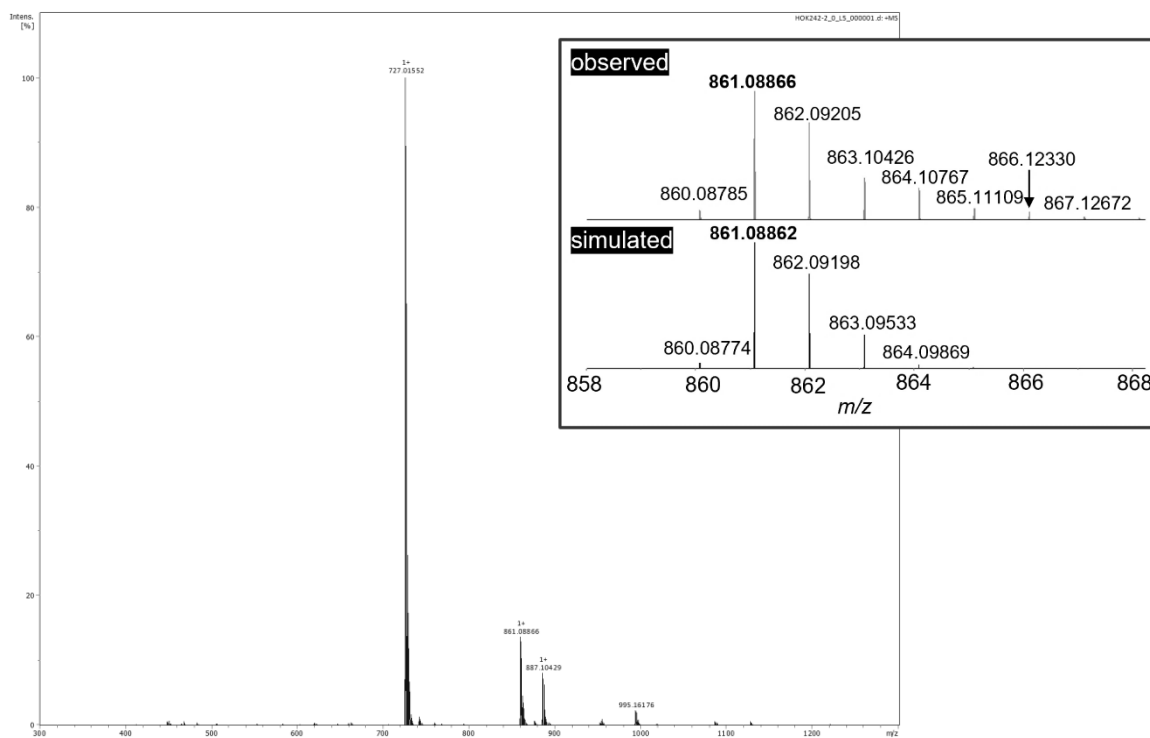

**Figure S10:** HRMS-MALDI (positive, dithranol) spectrum of **5b**.

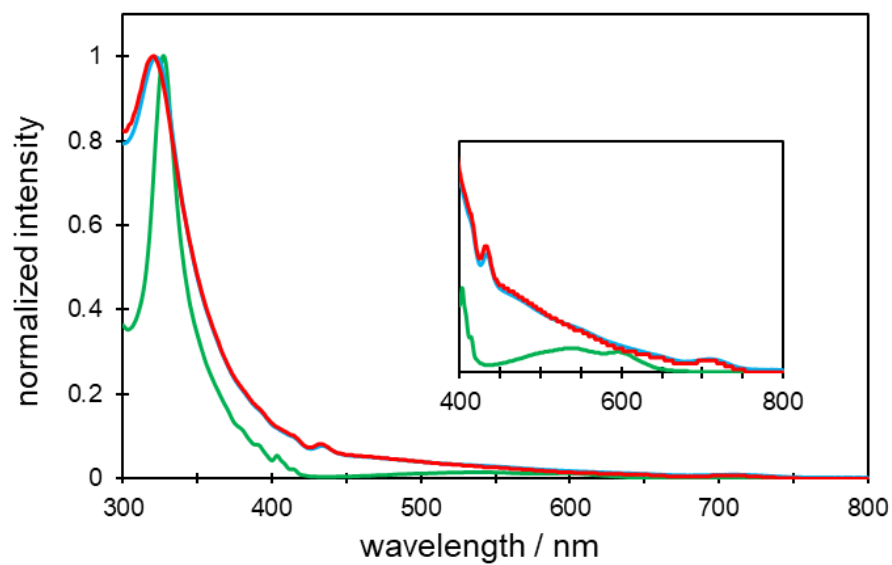

**Figure S11:** UV-vis absorption spectra of **5a** (blue), **5b** (red), and Li<sup>+</sup>@C<sub>60</sub> TFSI<sup>-</sup> (green) measured in dichloromethane.



## Computational details

Full geometry optimizations followed by frequency calculations have been carried out by using Gaussian 16 program at the B3LYP/6-31g(d) level. All frequency calculations showed no imaginary frequency. Full citation is as follows:

Gaussian 16, Revision C.01, M. J. Frisch, G. W. Trucks, H. B. Schlegel, G. E. Scuseria, M. A. Robb, J. R. Cheeseman, G. Scalmani, V. Barone, G. A. Petersson, H. Nakatsuji, X. Li, M. Caricato, A. V. Marenich, J. Bloino, B. G. Janesko, R. Gomperts, B. Mennucci, H. P. Hratchian, J. V. Ortiz, A. F. Izmaylov, J. L. Sonnenberg, D. Williams-Young, F. Ding, F. Lipparini, F. Egidi, J. Goings, B. Peng, A. Petrone, T. Henderson, D. Ranasinghe, V. G. Zakrzewski, J. Gao, N. Rega, G. Zheng, W. Liang, M. Hada, M. Ehara, K. Toyota, R. Fukuda, J. Hasegawa, M. Ishida, T. Nakajima, Y. Honda, O. Kitao, H. Nakai, T. Vreven, K. Throssell, J. A. Montgomery, Jr., J. E. Peralta, F. Ogliaro, M. J. Bearpark, J. J. Heyd, E. N. Brothers, K. N. Kudin, V. N. Staroverov, T. A. Keith, R. Kobayashi, J. Normand, K. Raghavachari, A. P. Rendell, J. C. Burant, S. S. Iyengar, J. Tomasi, M. Cossi, J. M. Millam, M. Klene, C. Adamo, R. Cammi, J. W. Ochterski, R. L. Martin, K. Morokuma, O. Farkas, J. B. Foresman, and D. J. Fox, Gaussian, Inc., Wallingford CT, 2019.

## Summary of calculated energies

|                                    | $E$ / Hartree | LUMO level |       |
|------------------------------------|---------------|------------|-------|
|                                    |               | Hartree    | eV    |
| $\text{Li}^+@C_{60} \text{TFSI}^-$ | -4120.8113    | -0.15594   | -4.24 |
| $C_{60}$                           | -2286.1742    | -0.11853   | -3.23 |

|                                                                                     | $E$ / Hartree | HOMO level |       |
|-------------------------------------------------------------------------------------|---------------|------------|-------|
|                                                                                     |               | Hartree    | eV    |
|    | -502.52977    | -0.17798   | -4.84 |
|   | -481.93011    | -0.18645   | -5.07 |
|  | -463.49085    | -0.19554   | -5.32 |
|  | -424.1714     | -0.20227   | -5.50 |
|  | -309.64825    | -0.22166   | -6.03 |
|  | -769.24449    | -0.2264    | -6.16 |

## Calculated geometrical coordinates

Li<sup>+</sup>@C<sub>60</sub> TFSI<sup>-</sup>

| x | y           | z           |             |             |                                     |
|---|-------------|-------------|-------------|-------------|-------------------------------------|
|   |             |             | C           | -2.41493300 | -0.54122100 6.83520200              |
| C | 2.42566000  | -1.78500400 | 9.75527700  | C           | -3.66399700 -1.15636800 9.32163700  |
| C | 1.64308700  | -2.40059900 | 8.69549700  | C           | -3.57725500 -0.97162200 10.76048900 |
| C | 0.52195800  | -3.09417700 | 9.30863000  | C           | -2.05391100 0.23581000 12.86355400  |
| C | 0.61204100  | -2.90706600 | 10.74809400 | C           | -0.86635300 1.04778000 13.12486500  |
| C | 1.78922000  | -2.09952700 | 11.02425200 | C           | 1.33294000 2.40596900 11.90992000   |
| C | 3.00400700  | -0.52984000 | 9.55732100  | C           | 1.96932200 2.71937300 10.64106800   |
| C | 2.82582700  | 0.16196400  | 8.29098800  | C           | -1.06414100 2.35054300 12.50283100  |
| C | 2.07370600  | -0.42852600 | 7.27451400  | C           | 0.01250200 3.01615100 11.91343400   |
| C | 1.46986800  | -1.73483400 | 7.48135900  | C           | 1.04314300 3.52500900 9.86090400    |
| C | 0.17066100  | -1.73735100 | 6.82852500  | C           | 0.95713700 3.34448900 8.47936800    |
| C | -0.90525300 | -2.40425300 | 7.41610100  | C           | -0.30884200 2.34888300 6.76513400   |
| C | -0.72598100 | -3.09477500 | 8.68301900  | C           | -1.43769800 1.57229600 6.50070800   |
| C | -1.93581500 | -2.91109100 | 9.46862200  | C           | -3.25059400 0.44958300 7.49364400   |
| C | -1.85100600 | -2.73455700 | 10.85211400 | C           | -3.86295500 0.14916000 8.71159300   |
| C | -0.55074100 | -2.73280000 | 11.50500800 | C           | -3.71624100 0.45011400 11.04015900  |
| C | -0.58511500 | -1.74446300 | 12.57724200 | C           | -2.96904900 1.04146300 12.06002200  |
| C | 0.55117100  | -0.96789100 | 12.84460200 | C           | -2.36293400 2.34576400 11.84938900  |
| C | 1.75809100  | -1.14637400 | 12.04715500 | C           | -0.16504700 3.71034300 10.64659100  |
| C | 2.36197000  | 0.16201200  | 11.84009400 | C           | -0.34152900 3.34135600 7.82682800   |
| C | 2.97048200  | 0.46299100  | 10.61905200 | C           | -2.64644900 1.75535200 7.28707300   |
| C | 2.77188900  | 1.76759700  | 10.00881700 | C           | -3.89664600 1.14127600 9.77265800   |
| C | 2.68316500  | 1.58146300  | 8.56984800  | C           | -3.31550400 2.39472400 9.57481800   |
| C | 1.14795800  | 0.37557400  | 6.49395400  | C           | -2.53366400 3.00988900 10.63509900  |
| C | -0.02778000 | -0.43333900 | 6.21807100  | C           | -1.41208600 3.70408500 10.02072700  |
| C | -2.22492200 | -1.79440700 | 7.41946100  | C           | -1.50222200 3.51731000 8.58213400   |
| C | -2.86213500 | -2.10845000 | 8.68787900  | C           | -2.67829400 2.70811300 8.30664200   |
| C | -2.68806400 | -1.74428800 | 11.51280300 | Li          | -0.62267400 0.00550100 11.14560700  |
| C | -1.91073800 | -1.13213700 | 12.58433800 | N           | -2.86096300 0.60453200 15.40196000  |
| C | 0.40521300  | 0.45996300  | 13.12258400 | S           | -1.91833700 -0.20152300 16.44646700 |
| C | 1.52714400  | 1.15380800  | 12.49984300 | S           | -3.67935600 1.97527300 15.71151000  |
| C | 1.79260800  | 2.35295400  | 7.82177600  | O           | -3.41323900 2.92713600 14.61840500  |
| C | 1.01025800  | 1.73818000  | 6.76202300  | C           | -5.41907300 1.38271000 15.36232200  |
| C | -1.29430400 | 0.15271400  | 6.22212300  | O           | -3.69061800 2.44812300 17.09519800  |

(continues)

|   | x           | y           | z           |   |             |                         |
|---|-------------|-------------|-------------|---|-------------|-------------------------|
|   |             |             |             | F | -3.82090900 | -2.04424500 16.56948400 |
| C | -3.09768600 | -1.29110400 | 17.40900200 | F | -2.39785000 | -2.09752300 18.21525500 |
| O | -1.13999700 | -1.15025900 | 15.63085200 | F | -5.51958100 | 0.94221500 14.09543100  |
| O | -1.22976500 | 0.61246200  | 17.44758500 | F | -5.75754000 | 0.38752400 16.18735800  |
| F | -3.92675100 | -0.54884600 | 18.14635900 | F | -6.27598800 | 2.39555300 15.52814000  |

C<sub>60</sub>

|   | x           | y          | z           |   |             |                        |
|---|-------------|------------|-------------|---|-------------|------------------------|
| C | -0.29735800 | 4.99508100 | 2.82955000  | C | -4.72430700 | 5.55831500 5.49977200  |
| C | -1.03492400 | 4.38629000 | 1.73521000  | C | -2.45969600 | 7.16331600 6.14146700  |
| C | -2.16669600 | 3.67036100 | 2.29982000  | C | -1.32784600 | 7.87921500 5.57689900  |
| C | -2.12858300 | 3.83673000 | 3.74314100  | C | -0.91302600 | 9.15075300 0.93235900  |
| C | -0.97327600 | 4.65543600 | 4.07056200  | C | -1.65046200 | 8.54193800 -0.16211000 |
| C | 0.27296600  | 6.25849900 | 2.66885300  | C | -3.91506400 | 6.93693700 -0.80380000 |
| C | 0.12946600  | 6.96542100 | 1.40712800  | C | -5.04691300 | 6.22103000 -0.23922600 |
| C | -0.57855100 | 6.38081400 | 0.35625200  | C | -6.37183100 | 5.55529400 2.19343000  |
| C | -1.17254300 | 5.06494300 | 0.52362300  | C | -6.33364400 | 5.72174300 3.63670300  |
| C | -2.44788400 | 5.05601600 | -0.17336700 | C | -4.88803500 | 6.91516800 5.78180300  |
| C | -3.53459300 | 4.36865300 | 0.36879300  | C | -3.73277500 | 7.73397900 6.10917100  |
| C | -3.39115800 | 3.66175300 | 1.63055400  | C | -1.51431800 | 9.13721400 5.00238000  |
| C | -4.62836500 | 3.81902400 | 2.37670900  | C | -0.83831200 | 9.47688500 3.76144600  |
| C | -4.59176200 | 3.97880200 | 3.76256100  | C | -3.92687000 | 9.04422400 5.51102000  |
| C | -3.31649800 | 3.98787100 | 4.45963500  | C | -2.84016300 | 9.73158900 4.96886700  |
| C | -3.39842100 | 4.96395600 | 5.53335600  | C | -1.74641100 | 10.28122800 2.96094500 |
| C | -2.28914200 | 5.75019000 | 5.84763000  | C | -1.78300700 | 10.12146300 1.57509100 |
| C | -1.05194500 | 5.59275000 | 5.10140000  | C | -2.97633800 | 9.13628300 -0.19569400 |
| C | -0.45790600 | 6.90858300 | 4.93401400  | C | -4.08561600 | 8.35004800 -0.50997100 |
| C | 0.19109400  | 7.23469300 | 3.74243400  | C | -5.91687100 | 7.19166100 0.40364500  |
| C | -0.00295100 | 8.54494400 | 3.14423600  | C | -6.56585600 | 6.86555400 1.59522700  |
| C | -0.04112400 | 8.37850000 | 1.70094700  | C | -6.50423600 | 7.13482500 3.93052700  |
| C | -1.48672600 | 7.18507200 | -0.44415000 | C | -5.79620800 | 7.71944100 4.98139800  |
| C | -2.64198300 | 6.36627400 | -0.77151400 | C | -5.20221900 | 9.03528900 4.81402400  |
| C | -4.86044800 | 4.96303100 | 0.33527200  | C | -2.98359700 | 10.43850200 3.70709300 |
| C | -5.53644000 | 4.62336600 | 1.57621900  | C | -3.05826100 | 10.11238500 0.87802800 |
| C | -5.46174300 | 4.94948800 | 4.40529800  | C | -5.32282200 | 8.50749600 0.23627300  |

(continues)

|   | X           | y          | z          |   |             |             |            |
|---|-------------|------------|------------|---|-------------|-------------|------------|
| C | -6.64774800 | 7.84174700 | 2.66881100 | C | -4.20805800 | 10.42988600 | 3.03782400 |
| C | -6.07739800 | 9.10516200 | 2.50811100 | C | -4.24617700 | 10.26352800 | 1.59452300 |
| C | -5.33984600 | 9.71395200 | 3.60244100 | C | -5.40150000 | 9.44481000  | 1.26709000 |

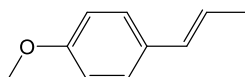

|   | x           | y           | z          |   |             |             |             |
|---|-------------|-------------|------------|---|-------------|-------------|-------------|
| C | 0.07590000  | -0.04400000 | 0.16460000 | C | 2.34610000  | -1.15310000 | 0.18740000  |
| C | 1.54430000  | -0.07740000 | 0.20520000 | H | 2.01730000  | 0.90500000  | 0.25580000  |
| C | -0.58240000 | 1.19350000  | 0.19250000 | H | 1.91230000  | -2.15200000 | 0.13730000  |
| C | -0.73200000 | -1.19880000 | 0.09790000 | C | 3.84500000  | -1.09650000 | 0.23220000  |
| C | -2.11400000 | -1.11370000 | 0.06170000 | C | -4.81020000 | 1.34620000  | 0.07740000  |
| C | -1.97450000 | 1.29910000  | 0.15670000 | H | -4.60480000 | 1.90570000  | 0.99980000  |
| C | -2.75060000 | 0.13820000  | 0.09070000 | H | -4.55380000 | 1.97300000  | -0.78720000 |
| H | -0.27030000 | -2.18170000 | 0.07400000 | H | -5.87170000 | 1.09460000  | 0.03760000  |
| H | -2.73090000 | -2.00570000 | 0.01040000 | H | 4.29030000  | -1.57000000 | -0.65410000 |
| H | 0.00920000  | 2.10500000  | 0.24380000 | H | 4.20730000  | -0.06390000 | 0.28140000  |
| H | -2.43440000 | 2.28050000  | 0.18060000 | H | 4.24030000  | -1.63610000 | 1.10420000  |
| O | -4.11530000 | 0.11050000  | 0.05070000 |   |             |             |             |

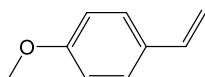

|   | x           | y           | z          |   |             |             |             |
|---|-------------|-------------|------------|---|-------------|-------------|-------------|
| C | 0.10835900  | -0.05008700 | 0.10958700 | H | -2.39896200 | 2.27555800  | 0.05547200  |
| C | 1.57734100  | -0.08849900 | 0.10073500 | O | -4.08014600 | 0.10472800  | 0.13360100  |
| C | -0.54679200 | 1.18837700  | 0.07606500 | C | 2.37174400  | -1.16683100 | 0.12934200  |
| C | -0.69910700 | -1.20595000 | 0.15056400 | H | 2.05175800  | 0.89285100  | 0.06656700  |
| C | -2.08104500 | -1.12086100 | 0.15744600 | H | 1.98788400  | -2.18298300 | 0.16410700  |
| C | -1.93913800 | 1.29423600  | 0.08240500 | H | 3.45237700  | -1.06339000 | 0.11866700  |
| C | -2.71600000 | 0.13241500  | 0.12338900 | C | -4.77586300 | 1.34047700  | 0.10050000  |
| H | -0.23563700 | -2.18787500 | 0.17742400 | H | -4.53869900 | 1.96090400  | 0.97498200  |
| H | -2.69980800 | -2.01240500 | 0.18899600 | H | -4.55091400 | 1.90613400  | -0.81346100 |
| H | 0.04656400  | 2.09958600  | 0.04403800 | H | -5.83750700 | 1.08720400  | 0.11550400  |

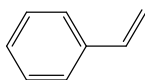

|   | x           | y           | z           |   |             |             |             |
|---|-------------|-------------|-------------|---|-------------|-------------|-------------|
|   |             |             |             | H | -2.71378000 | -2.12615800 | 0.09314900  |
| C | -0.00950000 | -0.04083200 | 0.08075400  | H | -0.14010600 | 2.10533900  | -0.06024000 |
| C | 1.46121900  | -0.01626700 | 0.14392500  | H | -2.60949500 | 2.16605800  | -0.17262700 |
| C | -0.70440900 | 1.17594300  | -0.02650100 | H | -3.91319000 | 0.04592300  | -0.09635700 |
| C | -0.76291300 | -1.22864900 | 0.12242800  | C | 2.29364700  | -1.05987000 | 0.24746400  |
| C | -2.15253500 | -1.19590200 | 0.05928000  | H | 1.89682900  | 0.98217700  | 0.09918800  |
| C | -2.09689900 | 1.21124100  | -0.08993100 | H | 1.94823100  | -2.08896000 | 0.29827500  |
| C | -2.82788800 | 0.02406800  | -0.04725300 | H | 3.36873700  | -0.91337700 | 0.28539400  |
| H | -0.25706000 | -2.18631100 | 0.20486600  |   |             |             |             |

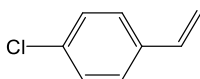

|   | x           | y           | z           |    |             |             |             |
|---|-------------|-------------|-------------|----|-------------|-------------|-------------|
|   |             |             |             | H  | -2.72324200 | -2.12728600 | 0.10104100  |
| C | -0.01018800 | -0.04014000 | 0.08130700  | H  | -0.15160700 | 2.10661100  | -0.06067000 |
| C | 1.45974700  | -0.01451400 | 0.14068900  | H  | -2.62500800 | 2.16196600  | -0.16669300 |
| C | -0.70928700 | 1.17386000  | -0.02467300 | Cl | -4.57119100 | 0.05284500  | -0.11365200 |
| C | -0.76438100 | -1.22709200 | 0.12523500  | C  | 2.29091000  | -1.05919500 | 0.24271800  |
| C | -2.15339600 | -1.20474200 | 0.06625100  | H  | 1.89510300  | 0.98365400  | 0.09435600  |
| C | -2.10088800 | 1.21569700  | -0.08499300 | H  | 1.94505400  | -2.08805900 | 0.29491300  |
| C | -2.81466400 | 0.02076300  | -0.03881500 | H  | 3.36605800  | -0.91362400 | 0.27794900  |
| H | -0.26213000 | -2.18628400 | 0.20670800  |    |             |             |             |

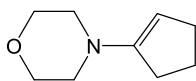

|   | x           | y           | z           |   |             |            |             |
|---|-------------|-------------|-------------|---|-------------|------------|-------------|
|   |             |             |             | H | 1.48146400  | 0.05147500 | 2.18300600  |
| O | 0.01238700  | 0.07756400  | -0.12144600 | H | 0.01179300  | 1.97189700 | -0.96683400 |
| C | 1.42323400  | 0.01129600  | 0.02801700  | H | 1.91804500  | 0.51824800 | -0.81725700 |
| C | -0.42326800 | 1.42998200  | -0.11067900 | H | -0.30610300 | 3.19846300 | 1.11133400  |
| C | 1.87294600  | 0.64924100  | 1.33989800  | H | 2.96512000  | 0.63457900 | 1.39643400  |
| C | -0.04031900 | 2.13874600  | 1.18718400  | C | 1.93910200  | 2.84962100 | 2.41028000  |
| N | 1.39947300  | 2.03577900  | 1.40927500  | C | 3.42131700  | 2.78378500 | 2.74196600  |
| H | -1.51106000 | 1.40775600  | -0.22650600 | C | 1.31494700  | 3.78135900 | 3.15873100  |
| H | 1.68991200  | -1.04976200 | 0.00761300  | C | 3.66134600  | 4.09453900 | 3.52701600  |
| H | -0.60880000 | 1.70736100  | 2.03090800  | C | 2.27150500  | 4.50329800 | 4.07799700  |

(continues)

|   | x          | y          | z          |   |            |                       |
|---|------------|------------|------------|---|------------|-----------------------|
|   |            |            |            | H | 2.13641300 | 5.59330200 4.07603600 |
| H | 0.24947200 | 3.98296000 | 3.15572400 | H | 4.01671700 | 4.86648700 2.83499300 |
| H | 4.05001300 | 2.71040000 | 1.84560200 | H | 4.41861800 | 3.98506200 4.31012200 |
| H | 3.64491000 | 1.90035900 | 3.35869700 | H | 2.14066100 | 4.18213200 5.12419700 |

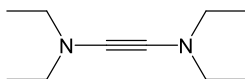

|   | x           | y          | z          |   |            |                        |
|---|-------------|------------|------------|---|------------|------------------------|
| C | 2.15309300  | 3.67194700 | 3.78750800 | C | 3.69192800 | 4.98488900 6.20665800  |
| N | 2.33646200  | 3.19962700 | 5.02902400 | H | 3.56307400 | 5.66631500 5.35870000  |
| C | 1.93552800  | 4.07575100 | 2.65324500 | H | 2.93309700 | 5.22710400 6.95847900  |
| N | 1.70504600  | 4.46189200 | 1.38999300 | H | 4.67873700 | 5.17033200 6.64839500  |
| C | 1.16931700  | 2.71948300 | 5.78069100 | H | 1.75415400 | 2.58681200 0.49365300  |
| C | 3.57992100  | 3.53044000 | 5.73555300 | H | 1.66863800 | 3.94683400 -0.62614200 |
| C | 2.14810500  | 3.59042000 | 0.29370200 | C | 3.66700900 | 3.50893700 0.10528800  |
| C | 1.39157200  | 5.87170200 | 1.12709200 | H | 4.09164400 | 4.47466600 -0.18934200 |
| H | 0.64515500  | 1.99587400 | 5.14496500 | H | 4.14486000 | 3.19519000 1.03959500  |
| H | 1.54192200  | 2.17003500 | 6.65376300 | H | 3.91816800 | 2.77597800 -0.67117200 |
| C | 0.18750600  | 3.81207100 | 6.21823000 | H | 0.97703700 | 5.93544600 0.11354500  |
| H | 0.64472800  | 4.50646100 | 6.93133200 | H | 0.59291500 | 6.16315400 1.81945600  |
| H | -0.14732200 | 4.38618800 | 5.34761000 | C | 2.57143000 | 6.83839900 1.27950800  |
| H | -0.69426200 | 3.36657300 | 6.69488300 | H | 3.00924900 | 6.74320300 2.27911600  |
| H | 3.66793300  | 2.84718000 | 6.58916600 | H | 3.35639000 | 6.63953100 0.54195200  |
| H | 4.41066600  | 3.30460500 | 5.05664700 | H | 2.23754700 | 7.87511400 1.14895700  |
